# Supplementary material for: Tuberculosis case fatality in India: a systematic review and meta-analysis
Source: PubMed Central journal article supplement (PMC7042607; doi:10.1136/bmjgh-2019-002080), 2020-01-20
Supplement: bmjgh-2019-002080supp001.pdf [file bmjgh-2019-002080supp001.pdf]

## S1. Supplemental Data

### S1.1 Search Strategy

Medline search string follows. Search string was translated for each database.

(exp Tuberculosis/ OR tuberculosis.mp. OR TB.mp.) AND

(exp India/ OR india.mp. OR indian.mp.) AND

(mortality.mp. OR exp Mortality/ OR exp Death/ OR death\*.mp. OR fatality.mp. OR CFR.mp. OR Follow-Up Studies/ OR follow\*.mp. OR Prospective Studies/ OR Retrospective Studies/ OR exp Treatment Outcome/ OR treatment outcome\*.mp. OR Survival Analysis/ OR Survival/ OR survival.mp. )

### S1.2 Extracted Variables

First author last name

Study year

Source population

Setting of the study (in hospitals, tertiary care vs primary/secondary)

Study location (state)

Avg. patient age

Percentage <15 years old

Percentage female

Percentage HIV+

Percentage MDR or any drug-resistance

Percentage treated in public vs private sector

Percentage re-treatment

Percentage EPTB

Percentage Smear positive

Percentage Microbiologically Confirmed (from any source)

Percentage urban

Patients received standard WHO DOTS? (Y/N)

Sample size (before loss to follow-up)

Average length of total follow-up

Maximum length of total follow-up

Person-years of follow-up

Number of patient deaths during entirety of follow-up

Overall case fatality proportion

{Average length of treatment follow-up

Maximum length of treatment follow-up

Person-years of treatment follow-up

Sample size of patient at beginning of treatment phase

Number of patients died during treatment phase

Number of patients with known outcome

Treatment case fatality rate

Average length of post-treatment follow-up

Maximum length of post-treatment follow-up

Person-years of post-treatment follow-up

Sample size of patient at beginning of post-treatment phase

Number of patients died during post-treatment phase

Number of patients with known outcome

Post-treatment case fatality rate}

{ } Repeat again for HIV positive/negative, adult/child, public/private, drug sensitive/drug resistant as available

#### S1.4 Studies which did not delineate between treatment and post-treatment phase

**Table S1.4.1:** *Studies where CFR was not delineated between treatment and post-treatment*

|                   | N   | Max follow-up (months) | CFR (95% CI)         |
|-------------------|-----|------------------------|----------------------|
| Sadana 2015       | 326 | 8                      | 11.04 (7.95, 15.08)  |
| Alvarez-Uria 2015 | 79  | 9                      | 60.76 (49.1, 71.36)  |
| Tutu 2017         | 115 | 12                     | 0.87 (0.05, 5.45)    |
| Sinha 2017        | 140 | 24                     | 12.14 (7.44, 19)     |
| Sinha 2017        | 31  | 12                     | 6.45 (1.13, 22.84)   |
| Gupta 2017        | 478 | 12                     | 13.39 (10.53, 16.85) |

### S1.3 Table of included studies

Abbreviations: DMC – district microscopy center, RNTCP – Indian revised national TB program, MDR – multi-drug resistant TB, ATT – anti-tuberculosis treatment, MSF – Doctors without Borders, DR – drug resistant, EPTB-extrapulmonary TB, SS+ - sputum smear positive, TU – treatment unit, HAART – highly active antiretroviral therapy, NSP – new smear positive, TBM – TB meningitis, RCT – randomized control trial, DTC – district tuberculosis center, PHC – primary healthcare center, XDR – extensively drug resistant, NA – not applicable

|   | First Author's Last Name | Year | Title                                                                                                                                                                                                                        | State          | Source Population                                                                                                                                          | Total Patients Enrolled |
|---|--------------------------|------|------------------------------------------------------------------------------------------------------------------------------------------------------------------------------------------------------------------------------|----------------|------------------------------------------------------------------------------------------------------------------------------------------------------------|-------------------------|
| 1 | Ahmad                    | 2013 | <i>Study Of Treatment Outcome Of New Sputum Smear Positive Tb Cases Under Dots – Strategy</i>                                                                                                                                | Maharashtra    | Newly diagnosed smear positive TB patients in urban Mumbai slum treated at DMC                                                                             | 281                     |
| 2 | Akshata                  | 2016 | <i>Management of multidrug resistant tuberculosis (MDR-TB) – Monitoring is the key to successful outcome</i>                                                                                                                 | Karnataka      | RNTCP-confirmed MDR TB patients treated at a Rajiv Gandhi Institute of Chest Diseases in Bangalore between Aug 2011 and June 2012                          | 69                      |
| 3 | Alvarez-Uria             | 2012 | <i>Natural History and Factors Associated with Early and Delayed Mortality in HIV-Infected Patients Treated of Tuberculosis under Directly Observed Treatment Short-Course Strategy: A Prospective Cohort Study in India</i> | Andhra Pradesh | all antituberculosis treatment (ATT) episodes of patients from the Vicente Ferrer HIV Cohort Study database from September 1st 2009, to September 1st 2011 | 1000                    |
| 4 | Ambadekar                | 2015 | <i>Treatment outcome and its attributes in TB-HIV co-infected patients registered under Revised National TB Control Program: a retrospective cohort analysis</i>                                                             | Maharashtra    | TB-HIV co-infected patients registered with RNTCP in Yavatmal district, from 2008 through 2011                                                             | 886                     |
| 5 | Andries                  | 2013 | <i>High Rate of Hypothyroidism in Multidrug-Resistant Tuberculosis Patients Co-Infected with HIV in Mumbai, India</i>                                                                                                        | Maharashtra    | Patients initiated on a multidrug-resistant TB regimen between October 2006 and March 2013 at an MSF HIV project in Mumbai                                 | 116                     |

|    |           |      |                                                                                                                                                                                                  |                             |                                                                                                                                |     |
|----|-----------|------|--------------------------------------------------------------------------------------------------------------------------------------------------------------------------------------------------|-----------------------------|--------------------------------------------------------------------------------------------------------------------------------|-----|
| 6  | Andries   | 2013 | <i>Viral Load for HIV Treatment Failure Management: A Report of Eight Drug-Resistant Tuberculosis Cases Co-Infected with HIV Requiring Second-Line Antiretroviral Treatment in Mumbai, India</i> | Maharashtra                 | DR TB/HIV patients treated at MSF center in Mumbai between Oct 2006 and July 2013                                              | 8   |
| 7  | Angadi    | 2016 | <i>A Follow Up Study on Newly Detected Sputum Positive Pulmonary Tuberculosis Cases on Anti-Tubercular Treatment in Bijapur Taluk</i>                                                            | Karnataka                   | All newly detected pulmonary TB cases during November 1st 2011-October 31st 2012 registered from Bijapur Taluk at DTC, Bijapur | 248 |
| 8  | Anuradha  | 2010 | <i>Predictors of stroke in patients of tuberculous meningitis and its effect on the outcome</i>                                                                                                  | Uttar Pradesh               | Adult patients with TB meningitis at outpatient and inpatient Medical University in Lucknow                                    | 100 |
| 9  | Arathi    | 2013 | <i>Osteoarticular Tuberculosis-A Three Years' Retrospective Study</i>                                                                                                                            | Uttar Pradesh               | Osteoarticular TB patients diagnosed between Jan 2010 and Dec 2012 at a medical college in Uttar Pradesh                       | 16  |
| 10 | Armstrong | 2014 | <i>Treating drug-resistant tuberculosis in a low-intensity chronic conflict setting in India</i>                                                                                                 | Andhra Pradesh-Chhattisgarh | DR TB patients treated as outpatients at MSF mobile clinic between Jan 2011 and Oct 2013                                       | 10  |
| 11 | Ashwini   | 2009 | <i>A Study on Treatment Outcome of Registered Tuberculosis Cases under RNTCP in Udupi Taluk, Karnataka</i>                                                                                       | Karnataka                   | TB patients registered under Udupi RNTCP between Jan and Dec 2007                                                              | 563 |
| 12 | Awasthi   | 2015 | <i>Abdominal Tuberculosis: A Diagnostic Dilemma</i>                                                                                                                                              | NA                          | HIV- abdominal TB patients treated at a tertiary teaching hospital in N. India between Jan 2010 and Dec 2014                   | 48  |
| 13 | Babu      | 2012 | <i>A Comparative Study Of Dot And Sat In Rural Tertiary Care Hospital: A Two Years Retrospective Study</i>                                                                                       | Karnataka                   | Pulmonary TB patients treated at a Karnataka hospital in 2010 and 2011                                                         | 131 |

|    |                |      |                                                                                                                                                                         |              |                                                                                                                                                                                                            |      |
|----|----------------|------|-------------------------------------------------------------------------------------------------------------------------------------------------------------------------|--------------|------------------------------------------------------------------------------------------------------------------------------------------------------------------------------------------------------------|------|
| 14 | Bag            | 2015 | <i>Resurgence Of Extra Pulmonary Tuberculosis</i>                                                                                                                       | Odisha       | EPTB cases treated at a medical college between 2009-2013                                                                                                                                                  | 2596 |
| 15 | Banu Rekha     | 2012 | <i>Efficacy of the 6-month thrice-weekly regimen in the treatment of new sputum smear-positive pulmonary tuberculosis under clinical trial conditions</i>               | Tamil Nadu   | Newly diagnosed SS+ HIV-pulmonary adult TB patients, above 30kg                                                                                                                                            | 249  |
| 16 | Brahmapurkar   | 2016 | <i>Death and defaulted trends among registered TB cases at Jagdalpur TU in Bastar district of Chattisgarh, India</i>                                                    | Chhattisgarh | TB patients registered at TU in Jagdalpur between 2010 and 2014                                                                                                                                            | 2533 |
| 17 | Brahmapurkar   | 2016 | <i>Treatment Outcome Of Registered Tuberculosis Cases For Year 2013 In Tuberculosis Unit In Tribal District Bastar Of Chhattisgarh, India</i>                           | Chhattisgarh | TB patients registered in 2013 at TU in Jagdalpur                                                                                                                                                          | 468  |
| 18 | Chandra        | 2017 | <i>Factors Determining the Clinical Spectrum, Course and Response to Treatment, and Complications in Seronegative Patients with Central Nervous System Tuberculosis</i> | Karnataka    | CNS TB patients seeking treatment at medical institute between Oct 2011 and Dec 2012                                                                                                                       | 43   |
| 19 | Chennaveerappa | 2014 | <i>TBDOTS Outcome in Relation to HIV Status: Experience in a Medical College</i>                                                                                        | Karnataka    | Patients being treated at tertiary teaching hospital in South India                                                                                                                                        | 280  |
| 20 | Daley          | 2015 | <i>Adjunctive vitamin D for treatment of active tuberculosis in India: a randomised, double-blind, placebo-controlled trial</i>                                         | Tamil Nadu   | Participants (aged 18–75 years) who were HIV negative and had pulmonary tuberculosis, with at least one documented positive sputum smear, treated at RNTCP clinics, who had taken one dose of ATT or fewer | 126  |
| 21 | Dandekar       | 2014 | <i>The Fate Of Tuberculosis Cases After Two Years Of DOTS Chemotherapy In Aurangabad City, Maharashtra</i>                                                              | Maharashtra  | TB patients registered with RNTCP in Aurangabad in 2006                                                                                                                                                    | 304  |

|    |          |      |                                                                                                                                                                                                                     |                |                                                                                                                                                                                 |     |
|----|----------|------|---------------------------------------------------------------------------------------------------------------------------------------------------------------------------------------------------------------------|----------------|---------------------------------------------------------------------------------------------------------------------------------------------------------------------------------|-----|
| 22 | Das      | 2014 | <i>HIV, multidrug-resistant TB and depressive symptoms: when three conditions collide</i>                                                                                                                           | Maharashtra    | Adult MDR TB/HIV patients treated at MSF clinic in Mumbai between Aug 2012 and March 2014 with mental health assessment performed before treatment initiation                   | 45  |
| 23 | Dave     | 2015 | <i>Direct Observation of Treatment Provided by a Family Member as Compared to Non- Family Member among Children with New Tuberculosis: A Pragmatic, Non-Inferiority, Cluster-Randomized Trial in Gujarat, India</i> | Gujarat        | Children aged <15 years with newly diagnosed TB and registered for treatment under the RNTCP in Gujarat between June 2012 and Sept 2012                                         | 265 |
| 24 | De       | 2011 | <i>Incidence and risk factors of immune reconstitution inflammatory syndrome in HIV-TB coinfecting patients</i>                                                                                                     | West Bengal    | Recently diagnosed HAART naive HIV-TB patients on ATT who started ART after 15 days of ATT, excluded non-adherent patients                                                      | 96  |
| 25 | Deepa    | 2013 | <i>The Impact of Isoniazid Resistance on the Treatment Outcomes of Smear Positive Re-Treatment Tuberculosis Patients in the State of Andhra Pradesh, India</i>                                                      | Andhra Pradesh | Smear positive re-treatment TB patients without rifampicin resistance registered for treatment in three selected districts of Andhra Pradesh from April 2011 to March 2012 1077 |     |
| 26 | Baburao  | 2009 | <i>Study of Tuberculosis cases under RNTCP attending Designated Microscopy Centre at Pravara Rural Hospital, Loni</i>                                                                                               | Uttar Pradesh  | DMC patients registered from Jan 2006 to June 2008                                                                                                                              | 611 |
| 27 | Bhardwaj | 2010 | <i>Evaluation of adequacy of short-course chemotherapy for extraspinal osteoarticular tuberculosis using <sup>99m</sup>Tc ciprofloxacin scan</i>                                                                    | Delhi          | Spinal TB patients treated at tertiary hospital between Oct 2006 and Jan 2008                                                                                                   | 25  |

|    |          |      |                                                                                                                                                                         |               |                                                                                                                                                                            |       |
|----|----------|------|-------------------------------------------------------------------------------------------------------------------------------------------------------------------------|---------------|----------------------------------------------------------------------------------------------------------------------------------------------------------------------------|-------|
| 28 | Chaudhri | 2013 | <i>Impact of psychiatric profile and personality trait on directly observed tuberculosis treatment outcome</i>                                                          | Uttar Pradesh | Adult new TB patients with psychiatric disorder diagnosed at DMC or initiated at DOTS center between Jan 2008 and Jan 2009, control arm of RCT on psychiatric intervention | 88    |
| 29 | Das      | 2016 | <i>Initial Sputum Smear Grading Is A Predictor Of Smear Conversion And Treatment Outcome In Pulmonary Tuberculosis: A Retrospective Cohort Study</i>                    | West Bengal   | SS+ patients registered at TU between Sep 2014 to Aug 2015                                                                                                                 | 355   |
| 30 | Dave     | 2013 | <i>Assessment Of Long-Term Outcome Among New Smear Positive Pulmonary Tb Patients Treated With Intermittent Regimen Under Rntcp – A Retrospective Cohort Study</i>      | Gujarat       | Cured/Treatment completed NSP patients who finished between Jan and June 2009                                                                                              | 706   |
| 31 | Dave     | 2015 | <i>Has introduction of rapid drug susceptibility testing at diagnosis impacted treatment outcomes among previously treated tuberculosis patients in Gujarat, India?</i> | Gujarat       | All SS+ previously treated patients registered with RNTCP Jan-Jun 2013 in Gujarat                                                                                          | 5829  |
| 32 | Dewan    | 2014 | <i>Early Outcome of Intermittent Directly Observed Treatment– Short Course, for Tuberculous Meningitis in Children: A Descriptive Analysis</i>                          | Delhi         | Children with TBM admitted to medical college hospital between May 2008 and March 2009                                                                                     | 30    |
| 33 | Dhawan   | 2016 | <i>Predictors of Neurological Outcome of Tuberculous Meningitis in Childhood: A Prospective Cohort Study From a Developing Country</i>                                  | NA            | Children with TBM at a research/teaching hospital in N. India                                                                                                              | 130   |
| 34 | Dhingra  | 2009 | <i>Tuberculosis Mortality Trends In Delhi After Implementation Of RNTCP</i>                                                                                             | Delhi         | All Delhi patients registered with RNTCP in 2006                                                                                                                           | 47608 |

|    |           |      |                                                                                                                                                         |               |                                                                                                         |     |
|----|-----------|------|---------------------------------------------------------------------------------------------------------------------------------------------------------|---------------|---------------------------------------------------------------------------------------------------------|-----|
| 35 | Dholakia  | 2013 | <i>Clinical profile and treatment outcomes of drug-resistant tuberculosis before directly observed treatment strategy plus: Lessons for the program</i> | Maharashtra   | DR TB patients attending a TU in Mumbai between Aug 2006 and Nov 2010                                   | 29  |
| 36 | Duraisamy | 2014 | <i>Does Alcohol Consumption during Multidrug-resistant Tuberculosis Treatment Affect Outcome?: A Population-based Study in Kerala, India</i>            | Kerala        | Culture-confirmed MDR TB patients treated under Kerala RNTCP between Jan 2009 and June 2010             | 179 |
| 37 | Garg      | 2013 | <i>Evaluation of prognostic factors in medically treated patients of spinal tuberculosis</i>                                                            | Uttar Pradesh | Spinal TB patients at Med. uni hospital July 2010 to Dec 2011                                           | 78  |
| 38 | George    | 2011 | <i>Predictors of mortality in patients with meningeal tuberculosis</i>                                                                                  | Kerala        | TBM patients treated at government hospital between Jan 2006 and Dec 2008                               | 98  |
| 39 | Gohel     | 2016 | <i>A study of 150 cases of intraperitoneal tuberculosis</i>                                                                                             | Gujarat       | Intraperitoneal TB treated at hospital between 2006 and 2009                                            | 150 |
| 40 | Gosavi    | 2015 | <i>A Step Towards Control Of Multidrug Resistant Tuberculosis: Hospital Based Study From Nashik India</i>                                               | Maharashtra   | MDR TB cases treated at private hospital between Jan 2012 and March 2014                                | 353 |
| 41 | Goyal     | 2012 | <i>Clinical and radiological prognostic indicators in childhood tuberculous meningitis</i>                                                              | Uttar Pradesh | Pediatric TBM patients treated at tertiary govt hospital between Sep 2010 and Aug 2011                  | 53  |
| 42 | Gupta     | 2015 | <i>Spinal Cord and Spinal Nerve Root Involvement (Myeloradiculopathy) in Tuberculous Meningitis</i>                                                     | Uttar Pradesh | TBM patients diagnosed at government hospital between Nov 2011 and Nov 2013                             | 71  |
| 43 | Isaakidis | 2012 | <i>Adverse Events among HIV/MDR-TB Co-Infected Patients Receiving Antiretroviral and Second Line Anti-TB Treatment in Mumbai, India</i>                 | Maharashtra   | MDR-TB patients who were initiated on ATT and ART between May 2007 and Sep 2011 at MSF clinic in Mumbai | 67  |



|    |           |      |                                                                                                                                                             |                |                                                                                                                       |     |
|----|-----------|------|-------------------------------------------------------------------------------------------------------------------------------------------------------------|----------------|-----------------------------------------------------------------------------------------------------------------------|-----|
| 44 | Isaakidis | 2011 | <i>Ambulatory Multi-Drug Resistant Tuberculosis Treatment Outcomes in a Cohort of HIV-Infected Patients in a Slum Setting in Mumbai, India</i>              | Maharashtra    | HIV MDR TB patients treated at an outpatient MSF clinic in Mumbai between May 2007 and May 2011                       | 58  |
| 45 | Isaakidis | 2015 | <i>Outcomes in Adolescents Undergoing Treatment for Drug-Resistant Tuberculosis in Mumbai</i>                                                               | Maharashtra    | Adolescent DR-TB patients treated at MSF clinic in Mumbai between July 2007 and April 2015                            | 44  |
| 46 | Isaakidis | 2013 | <i>Poor Outcomes in a Cohort of HIV-Infected Adolescents Undergoing Treatment for Multidrug-Resistant Tuberculosis in Mumbai, India</i>                     | Maharashtra    | MSF treated teen MDR TB patients, Jul 2007 to Jan 2013                                                                | 8   |
| 47 | Iype      | 2011 | <i>In-hospital mortality of intermittent vs daily antitubercular regimen in patients with meningeal tuberculosis - a retrospective study</i>                | Kerala         | TBM patients treated at medical college in Kerala between Jan 2006 and Dec 2009                                       | 98  |
| 48 | Iype      | 2014 | <i>Major outcomes of patients with tuberculous meningitis on directly observed thrice a week regime</i>                                                     | Kerala         | Adult TBM patients registered under RNTCP between Jan 2010 and Dec 2011 with Thwaites index 4 or below                | 47  |
| 49 | Iype      | 2009 | <i>Preliminary report of directly observed treatment, short course in tuberculous meningitis</i>                                                            | NA             | TBM patients at medical college treated between Nov 2006 and Apr 2008                                                 | 12  |
| 50 | Jain      | 2010 | <i>Outcomes of category III and I in immunocompetent patients of tuberculous lymphadenopathy treated in revised national tuberculosis control programme</i> | Madhya Pradesh | All Category I and III TB lymphadenopathy treated at hospital in Indore                                               | 295 |
| 51 | Jain      | 2013 | <i>Pediatric Tuberculosis in Young Children in India: A Prospective Study</i>                                                                               | Maharashtra    | Children under 5 with suspected TB treated at government hospital and associated clinic between Aug 2010 and Mar 2012 | 26  |

|    |          |      |                                                                                                                                                                     |               |                                                                                                       |     |
|----|----------|------|---------------------------------------------------------------------------------------------------------------------------------------------------------------------|---------------|-------------------------------------------------------------------------------------------------------|-----|
| 52 | Jain     | 2011 | <i>Profile of patients with gastrointestinal TB at a tertiary care centre in western India</i>                                                                      | Maharashtra   | Patients with abdominal TB treated at a Mumbai hospital between Jan and Dec 2009                      | 32  |
| 53 | Jain     | 2014 | <i>Treatment outcome of standardized regimen in patients with multidrug resistant tuberculosis</i>                                                                  | NA            | All Category IV patients treated under RNTCP in an area in W. India between Jan 2009 and Dec 2009     | 130 |
| 54 | Jha      | 2015 | <i>Definite (microbiologically confirmed) tuberculous meningitis: predictors and prognostic impact</i>                                                              | Uttar Pradesh | Adult TBM patients at a tertiary hospital between Oct 2012 and Jan 2014                               | 118 |
| 55 | Joseph   | 2011 | <i>Outcome of standardized treatment for patients with MDRTB from Tamil Nadu, India</i>                                                                             | Tamil Nadu    | DST confirmed adult MDR TB patients treated in Chennai RNTCP program between June 2006 and Sep 2007   | 38  |
| 56 | Joseph   | 2011 | <i>Treatment outcomes among new smear positive and retreatment cases of tuberculosis in Mangalore, South India – a descriptive study</i>                            | Karnataka     | Category I (NSP) and II patients registered at Mangalore TU between June 2008 and May 2009            | 286 |
| 57 | Kadarkar | 2016 | <i>Correlates of non-compliance to follow up sputum examination and treatment outcomes among tuberculosis patients under RNTCP in tribal area of Thane district</i> | Maharashtra   | TB patients registered in Ganeshpuri DTC Jan to Dec 2013                                              | 126 |
| 58 | Kalita   | 2014 | <i>Predictors of paradoxical tuberculoma in tuberculous meningitis</i>                                                                                              | NA            | Microbiologically confirmed TBM patients treated at a tertiary hospital between Aug 2009 and Feb 2012 | 34  |
| 59 | Kalita   | 2014 | <i>Safety and efficacy of levofloxacin versus rifampicin in tuberculous meningitis: an open-label randomized controlled trial</i>                                   | NA            | Adult new TBM patients treated at tertiary medical center between Jul 2009 and June 2012              | 60  |

|    |          |      |                                                                                                                                                                        |                   |                                                                                                 |     |
|----|----------|------|------------------------------------------------------------------------------------------------------------------------------------------------------------------------|-------------------|-------------------------------------------------------------------------------------------------|-----|
| 60 | Kapadia  | 2016 | <i>Adverse Drug Reactions And Outcome Analysis Of MDR TB Patients On DOTS Plus Regimen</i>                                                                             | Gujarat           | MDR TB patients who completed treatment between Aug 2007 and June 2014 in Ahmedabad             | 102 |
| 61 | Karmakar | 2011 | <i>Clinical Characteristics of Tuberculosis-Associated Immune Reconstitution Inflammatory Syndrome in North Indian Population of HIV/AIDS Patients Receiving HAART</i> | Delhi             | HIV-TB ART-naive patients treated at a Delhi hospital ART clinic                                | 134 |
| 62 | Kaur     | 2015 | <i>Prospective Analysis of 55 Cases of Tuberculosis Meningitis (TBM) in North India</i>                                                                                | Chandigarh        | TBM patients treated in a tertiary referral centre between Aug 2010 and Feb 2011                | 55  |
| 63 | Kumar    | 2016 | <i>Prevalence and outcome of headache in tuberculous meningitis</i>                                                                                                    | Uttar Pradesh     | New HIV- TBM patients with headache attending tertiary hospital between Oct 2012 and March 2014 | 95  |
| 64 | Lal      | 2014 | <i>Study of gastro intestinal tuberculosis and role of surgery in its management in Navi Mumbai: analysis of 50 cases</i>                                              | Maharashtra       | Gastrointestinal TB patients treated at private hospital between Aug 2010 and Oct 2012          | 50  |
| 65 | Lodha    | 2014 | <i>Effect of micronutrient supplementation on treatment outcomes in children with intrathoracic tuberculosis: a randomized controlled trial</i>                        | Delhi             | Pediatric intrathoracic TB patients in control arm of micronutrient RTC, Jan 2008 to Jun 2012   | 100 |
| 66 | Lone     | 2014 | <i>Impact of clinicoradiological parameters on the outcome of treatment in brain tuberculosis</i>                                                                      | Jammu and Kashmir | Brain TB patients presenting at tertiary hospital between Nov 2009 and Nov 2011                 | 61  |
| 67 | Makharia | 2015 | <i>Intermittent Directly Observed Therapy for Abdominal Tuberculosis: A Multicenter Randomized Controlled Trial Comparing 6 Months Versus 9 Months of Therapy</i>      | NA                | Adult HIV- new abdominal TB patients at three tertiary centers                                  | 191 |

|    |              |      |                                                                                                                                                                                             |                               |                                                                                                             |     |
|----|--------------|------|---------------------------------------------------------------------------------------------------------------------------------------------------------------------------------------------|-------------------------------|-------------------------------------------------------------------------------------------------------------|-----|
| 68 | Malhotra     | 2013 | <i>Corticosteroids (dexamethasone versus intravenous methylprednisolone) in patients with tuberculous meningitis</i>                                                                        | Uttar Pradesh                 | Control arm of RCT in adult TBM patients treated at government hospital between Jan 2006 and Jul 2007       | 32  |
| 69 | Mandal       | 2013 | <i>Comparing the Daily Versus the Intermittent Regimens of the Anti-Tubercular Chemotherapy in the Initial Intensive Phase in Non-HIV, Sputum Positive, Pulmonary Tuberculosis Patients</i> | West Bengal                   | HIV- sputum positive pulmonary TB patients at tertiary care center between Jan 2010 and Dec 2011            | 83  |
| 70 | Mishra       | 2007 | <i>A study of effectiveness of DOTS on tuberculosis patients treated under RNTCP programme</i>                                                                                              | Madhya Pradesh                | Patients registered at DOTS centres between Jul and Sep 2006 in Gwalior                                     | 312 |
| 71 | Mukhopadhyay | 2011 | <i>Comparative Analysis of RNTCP Indicators in a Rural and an Urban Tuberculosis Unit of Burdwan District in West Bengal</i>                                                                | West Bengal                   | Patients at TU in 2007                                                                                      | 898 |
| 72 | Nagaraja     | 2011 | <i>How Do Patients Who Fail First-Line TB Treatment but Who Are Not Placed on an MDR-TB Regimen Fare in South India?</i>                                                                    | Andhra Pradesh                | Re-treatment resistant RNTCP patients who were not given Category IV                                        | 202 |
| 73 | Naik         | 2015 | <i>Treatment Outcome of Patients with Extrapulmonary Tuberculosis on DOTS in a Teaching Hospital</i>                                                                                        | Karnataka                     | RNTCP treated EPTB patients diagnosed at private teaching hospital between 2010 and 2012                    | 669 |
| 74 | Nair         | 2016 | <i>Impact of rapid molecular diagnostic tests on time to treatment initiation and outcomes in patients with multidrug-resistant TB, Tamil Nadu, India</i>                                   | Tamil Nadu                    | MDR-TB patients in Tamil Nadu diagnosed with culture and sputum smear testing between Sep 2010 and Sep 2011 | 524 |
| 75 | Nair         | 2017 | <i>Predictors of unfavourable treatment outcome in patients with multidrug-resistant tuberculosis in India</i>                                                                              | Kerala, Delhi and West Bengal | all patients enrolled for MDR-TB treatment in three states from Jan 2009 to Dec 2011                        | 788 |

|    |            |      |                                                                                                                                                                            |           |                                                                                                |      |
|----|------------|------|----------------------------------------------------------------------------------------------------------------------------------------------------------------------------|-----------|------------------------------------------------------------------------------------------------|------|
| 76 | Nelliyanil | 2012 | <i>A Study Of The Socio-Demographic Profile And Treatment Outcome Of Paediatric Tuberculosis Patients In Bangalore Mahanagar Palike Area</i>                               | Karnataka | Pediatric patients registered in 2009                                                          | 209  |
| 77 | Padda      | 2015 | <i>Treatment outcome of TB patients in a district of north India: a three year study</i>                                                                                   | Punjab    | RNTCP patients registered between Jan 2011 and Dec 2013                                        | 2571 |
| 78 | Panigatti  | 2014 | <i>Profile and Outcome of Childhood Tuberculosis Treated with DOTS—An Observational Study</i>                                                                              | Karnataka | Pediatric cases at government hospital receiving standard DOTS from Nov 2009 to Apr 2011       | 93   |
| 79 | Parida     | 2014 | <i>Comparison of Directly Observed Treatment Short Course (DOTS) with Self-Administered Therapy in Pulmonary Tuberculosis in Udupi District of Southern India</i>          | Bangalore | Pulmonary TB patients diagnosed between Mar 2010 and Feb 2011, DOT arm of study                | 75   |
| 80 | Patel      | 2016 | <i>A Study Of The Timing Of Death In Patients With Tuberculosis Who Die During Anti-Tuberculosis Treatment</i>                                                             | Gujarat   | All TB patients treated between Jan 2007 and Apr 2012 at charitable hospital                   | 376  |
| 81 | Patel      | 2016 | <i>Treatment outcome among cases of multidrug-resistant tuberculosis (MDR TB) in Western India: A prospective study</i>                                                    | Gujarat   | MDR patients registered at DOTS centre in govt hospital, Feb to Dec 2010                       | 145  |
| 82 | Pathan     | 2014 | <i>HIV Serostatus And Treatment Outcome Among Patients Registered Under RNTCP</i>                                                                                          | Gujarat   | TB patients registered with the RNTCP in 2009                                                  | 395  |
| 83 | Phageshwar | 2013 | <i>Incidence of Multidrug-Resistant (MDR) and Extensively drug Resistant (XDR) Tuberculosis among Different age Groups in Tertiary Care Hospitals of Chandigarh, India</i> | Punjab    | Pulmonary TB patients registered to RNTCP at government hospital between Mar 2008 and Feb 2012 | 52   |

|    |              |      |                                                                                                                                                            |                                      |                                                                                      |      |
|----|--------------|------|------------------------------------------------------------------------------------------------------------------------------------------------------------|--------------------------------------|--------------------------------------------------------------------------------------|------|
| 84 | Piparva      | 2017 | <i>Treatment Outcome Of Tuberculosis Patients On Dots Therapy For Category 1 And 2 At District Tuberculosis Centre</i>                                     | Gujarat                              | Category I and II patients registered at DTC in 2013 and 2014                        | 1340 |
| 85 | Raizada      | 2009 | <i>Linking HIV-Infected TB Patients to Cotrimoxazole Prophylaxis and Antiretroviral Treatment in India</i>                                                 | Andhra Pradesh                       | TB-HIV patients reported to RNTCP Mar to Aug 2007                                    | 734  |
| 86 | Ramachandran | 2017 | <i>Factors Influencing Tuberculosis Treatment Outcome in Adult Patients Treated with Thrice-Weekly Regimens in India</i>                                   | Tamil Nadu                           | Adult patients at RNTCP treatment centers from Oct 2013 to Sep 2015                  | 1912 |
| 87 | Ramachandran | 2016 | <i>Low Serum Concentrations of Rifampicin and Pyrazinamide Associated with Poor Treatment Outcomes in Children with Tuberculosis Related to HIV Status</i> | Tamil Nadu, Uttar Pradesh, Karnataka | Pediatric TB patients treated at hospital TB centres, 2010-2013                      | 161  |
| 88 | Ramzam       | 2013 | <i>Childhood Tubercular Meningitis: An Institutional Experience and Analysis of Predictors of Outcome</i>                                                  | Kashmir                              | TBM ped patients treated at government hospital from June 2007 to May 2011           | 65   |
| 89 | Rathee       | 2016 | <i>Comparative study of clinico-bacterio-radiological profile and treatment outcome of smokers and nonsmokers suffering from pulmonary tuberculosis</i>    | NA                                   | Adult pulmonary drug sensitive TB patients registered with RNTCP                     | 101  |
| 90 | Raut         | 2013 | <i>Hydrocephalus in tuberculous meningitis: Incidence, its predictive factors and impact on the prognosis</i>                                              | Uttar Pradesh                        | TBM patients at tertiary state university hospital treated from Oct 2010 to Aug 2012 | 80   |
| 91 | Sadana       | 2015 | <i>Socio-Demographic Factors Affecting The Treatment Outcome In Patients Of Tuberculosis</i>                                                               | Punjab                               | Category I, II and III patients registered at DTC between Apr 2010 and Mar 2011      | 326  |
| 92 | Saha         | 2016 | <i>Predictors of Treatment Outcome for Retreatment Pulmonary Tuberculosis Cases among Tribal People of an</i>                                              | West Bengal                          | Retreatment tribal TB cases registered in TUs in 2013                                | 177  |

|     |               |      |                                                                                                                                                                             |                |                                                                                                                                  |      |
|-----|---------------|------|-----------------------------------------------------------------------------------------------------------------------------------------------------------------------------|----------------|----------------------------------------------------------------------------------------------------------------------------------|------|
|     |               |      | <i>Eastern India District: A Prospective Cohort Study</i>                                                                                                                   |                |                                                                                                                                  |      |
| 93  | Samual        | 2016 | <i>Relationship between Nutritional Support and Tuberculosis Treatment Outcomes in West Bengal, India</i>                                                                   | West Bengal    | SS+ PTB patients living below poverty line registered at TU between 2012 and 2013, some received nutritional support but not RCT | 573  |
| 94  | Sarpal        | 2014 | <i>Treatment Outcome Among the Retreatment Tuberculosis (TB) Patients under RNTCP in Chandigarh, India</i>                                                                  | Punjab         | Retreatment cases registered under RNTCP between Jun 2010 and Dec 2011                                                           | 545  |
| 95  | Satyanarayana | 2010 | <i>Characteristics and Programme-Defined Treatment Outcomes among Childhood Tuberculosis (TB) Patients under the National TB Programme in Delhi</i>                         | Delhi          | Pediatric TB patients registered with the RNTCP between Jan and June 2008                                                        | 1074 |
| 96  | Satyanarayana | 2011 | <i>Tuberculosis 'retreatment others': profile and treatment outcomes in the state of Andhra Pradesh, India</i>                                                              | Andhra Pradesh | Retreatment patients registered at TUs between Jul and Sep 2008                                                                  | 1009 |
| 97  | Sharma        | 2015 | <i>Clinicopathologic Spectrum of Cutaneous Tuberculosis: A Retrospective Analysis of 165 Indians</i>                                                                        | Delhi          | BCG vaccinated cerebral TB patients treated at tertiary public hospital                                                          | 165  |
| 98  | Sharma        | 2015 | <i>Comparative Study of Laparoscopic Abdominopelvic and Fallopian Tube Findings Before and After Antitubercular Therapy in Female Genital Tuberculosis With Infertility</i> | Delhi          | Female genital TB patients at tertiary public hospital                                                                           | 50   |
| 99  | Sharma        | 2013 | <i>Directly observed treatment, short course in tuberculous meningitis: Indian perspective</i>                                                                              | Meghalaya      | TBM patients at government tertiary hospital, diagnosed between Sep 2008 and Mar 2011                                            | 42   |
| 100 | Sharma        | 2017 | <i>Multi drug resistant female genital tuberculosis: A preliminary report</i>                                                                                               | Delhi          | Female genital TB patients at tertiary hospital between Jan 2012 and June 2016                                                   | 6    |

|     |          |      |                                                                                                                                                                                     |                                           |                                                                                                                                                     |       |
|-----|----------|------|-------------------------------------------------------------------------------------------------------------------------------------------------------------------------------------|-------------------------------------------|-----------------------------------------------------------------------------------------------------------------------------------------------------|-------|
| 101 | Sharma   | 2012 | <i>Outcomes of Category III DOTS treatment in immunocompetent patients with tuberculosis pleural effusion</i>                                                                       | Delhi, Andhra Pradesh, Gujarat, Rajasthan | Unilateral pleural effusion patients aged between 15 and 65 years treated as outpatients four tertiary hospitals across India between 2006 and 2011 | 351   |
| 102 | Shastri  | 2013 | <i>TB treatment outcomes among TB-HIV co-infections in Karnataka, India: how do these compare with non-HIV tuberculosis outcomes in the province?</i>                               | Karnataka                                 | Programmatic data of TB and TB-HIV patients registered between Apr 2010 and Mar 2011                                                                | 58446 |
| 103 | Shibin   | 2014 | <i>A Case Control Study on Clinical Characteristics And Treatment Outcomes In Tuberculosis Patients With Diabetes in Palakkad District</i>                                          | Kerala                                    | DTC adult TB patients enrolled Jan to Jul 2014                                                                                                      | 130   |
| 104 | Shivam   | 2014 | <i>Gender Differentials in Tuberculosis: An Experience from a Rural Tuberculosis Unit of Burdwan District, West Bengal, India</i>                                                   | West Bengal                               | Patients registered at TU between Nov 2010 and Dec 2011                                                                                             | 758   |
| 105 | Siddiqui | 2016 | <i>Effect of Diabetes Mellitus on Tuberculosis Treatment Outcome and Adverse Reactions in Patients Receiving Directly Observed Treatment Strategy in India: A Prospective Study</i> | Delhi                                     | TB patients diagnosed at PHC Jan to Sep 2014                                                                                                        | 316   |
| 106 | Singh    | 2015 | <i>Clinicoradiological Profile of Lower Lung Field Tuberculosis Cases among Young Adult and Elderly People in a Teaching Hospital of Madhya Pradesh, India</i>                      | Madhya Pradesh                            | Adult (>12 yo) PTB patients treated at public tertiary hospital Jan 2012 to Jan 2015                                                                | 215   |
| 107 | Singh    | 2016 | <i>Tuberculous lymphadenopathy: Experience from the referral center of Northern India</i>                                                                                           | Madhya Pradesh                            | TB lymphadenopathy patients (>12 yo) treated at a tertiary hospital between Jul 2013 and Jun 2014                                                   | 204   |



|     |             |      |                                                                                                                                                                                                             |             |                                                                                                                                                                                   |      |
|-----|-------------|------|-------------------------------------------------------------------------------------------------------------------------------------------------------------------------------------------------------------|-------------|-----------------------------------------------------------------------------------------------------------------------------------------------------------------------------------|------|
| 108 | Sinha       | 2012 | <i>Early versus delayed initiation of antiretroviral therapy for Indian HIV-Infected individuals with tuberculosis on antituberculosis treatment</i>                                                        | Delhi       | Adult newly diagnosed HIV-TB patients in RCT on the timing of ART initiation relative to ATT, took only delayed ART control arm, treated as outpatients at govt tertiary hospital | 150  |
| 109 | Sinha       | 2013 | <i>Nevirapine versus efavirenz-based antiretroviral therapy regimens in antiretroviral-naïve patients with HIV and tuberculosis infections in India: a pilot study</i>                                      | Delhi       | Newly diagnosed HIV-TB patients at tertiary hospital ART clinic between Sep 2007 and Dec 2012                                                                                     | 135  |
| 110 | Sinha       | 2011 | <i>The antiretroviral efficacy of highly active antiretroviral therapy and plasma nevirapine concentrations in HIV-TB co-infected Indian patients receiving rifampicin based antituberculosis treatment</i> | Delhi       | TB HIV patients at tertiary hospital diagnosed between Sep 2007 and Mar 2011                                                                                                      | 63   |
| 111 | Soman       | 2014 | <i>Successful Management of Highly Drug Resistant Tuberculosis with Individualised Drug Susceptibility Testing</i>                                                                                          | Maharashtra | MDR+ and XDR patients treated at a tertiary hospital                                                                                                                              | 52   |
| 112 | Swaminathan | 2011 | <i>Efficacy and Safety of Once-Daily Nevirapine- or Efavirenz-Based Antiretroviral Therapy in HIV-Associated Tuberculosis: A Randomized Clinical Trial</i>                                                  | Tamil Nadu  | RCT of HIV drugs among adult newly diagnosed HIV/TB patients, took both arms                                                                                                      | 122  |
| 113 | Thakor      | 2011 | <i>Profile of paediatric TB cases in Ahmedabad Municipal Corporation area during year 2007 to 2009</i>                                                                                                      | Gujarat     | Pediatric patients treated at TU between 2007 and 2009                                                                                                                            | 2253 |
| 114 | Thomas      | 2011 | <i>Extensively drug-resistant tuberculosis: experience at the Tuberculosis Research Centre, Chennai, India</i>                                                                                              | Tamil Nadu  | MDR and XDR patients, 2006-2007 cohort                                                                                                                                            | 38   |

|     |            |      |                                                                                                                                                                                        |               |                                                                                                    |      |
|-----|------------|------|----------------------------------------------------------------------------------------------------------------------------------------------------------------------------------------|---------------|----------------------------------------------------------------------------------------------------|------|
| 115 | Tiwari     | 2012 | <i>Relationship Between Sputum Smear Grading And Smear Conversion Rate And Treatment Outcome In The Patients Of Pulmonary Tuberculosis Undergoing Dots- A Prospective Cohort Study</i> | Delhi         | Category I SS+ TB patients treated at DOTS centres between Nov 2006 and Oct 2007                   | 338  |
| 116 | Tripathi   | 2015 | <i>Treatment Outcome Of Tuberculosis In Hiv Seropositive Patients: An Experience Of Southeast Region Of Ahmedabad</i>                                                                  | Gujarat       | HIV TB patients starting ATT at a medical college between Jan 2012 and Dec 2013                    | 120  |
| 117 | Tripathy   | 2013 | <i>Effectiveness of a community-based observation of anti-tuberculosis treatment in Bangalore City, India, 2010–2011</i>                                                               | Karnataka     | New SS+ RNTCP patients treated between Oct 2010 and Sep 2011                                       | 1864 |
| 118 | Udwadia    | 2014 | <i>Multidrug-resistant-tuberculosis treatment in the Indian private sector: Results from a tertiary referral private hospital in Mumbai</i>                                            | Maharashtra   | MDR TB patients treated at non-profit tertiary hospital between 2006 and 2010                      | 78   |
| 119 | Varshney   | 2011 | <i>Incidence of various clinico-morphological variants of cutaneous tuberculosis and HIV concurrence: a study from the Indian subcontinent</i>                                         | Uttar Pradesh | Cerebral TB patients treated at a private hospital between Oct 2007 and Nov 2009                   | 131  |
| 120 | Vashishtha | 2013 | <i>Efficacy and safety of thrice weekly DOTS in tuberculosis patients with and without HIV co-infection: an observational study</i>                                                    | Delhi         | TB HIV patients initiating treatment at tertiary government hospital between Apr 2006 and Oct 2010 | 305  |
| 121 | Vasudevan  | 2014 | <i>Smear Conversion, Treatment Outcomes and the Time of Default in Registered Tuberculosis Patients on RNTCP DOTS in Puducherry, Southern India</i>                                    | Puducherry    | TB patients at TU between Jan and Jun 2011                                                         | 660  |

|     |             |      |                                                                                                                                                                                                                  |                               |                                                                         |      |
|-----|-------------|------|------------------------------------------------------------------------------------------------------------------------------------------------------------------------------------------------------------------|-------------------------------|-------------------------------------------------------------------------|------|
| 122 | Veeramani   | 2016 | <i>Study on outcome of the treatment of tuberculosis patients registered under Revised National Tuberculosis Control Programme – DOTS strategy</i>                                                               | Tamil Nadu                    | TB patients registered at DOTS centers in 2014                          | 282  |
| 123 | Velayutham  | 2016 | <i>Factors associated with sputum culture conversion in multidrug-resistant pulmonary tuberculosis</i>                                                                                                           | West Bengal, Delhi and Kerala | DR TB patients treated by RNTCP between Jan 2009 and Dec 2011           | 787  |
| 124 | Vijay       | 2011 | <i>Treatment Outcome and Mortality at One and Half Year Follow-Up of HIV Infected TB Patients Under TB Control Programme in a District of South India</i>                                                        | Karnataka                     | TB-HIV patients registered with the RNTCP between Jul 2007 and Jun 2008 | 281  |
| 125 | Viswanathan | 2014 | <i>Effect of diabetes on treatment outcome of smear-positive pulmonary tuberculosis— A report from South India</i>                                                                                               | Tamil Nadu                    | TB patients registered at TUs between Jan and Mar 2011                  | 245  |
| 126 | Shibin      | 2014 | <i>A Case Control Study On Clinical Characteristics And Treatment Outcomes In Tuberculosis Patients With Diabetes In Palakkad District</i>                                                                       | Kerala                        | DTC TB patients                                                         | 130  |
| 127 | Patel       | 2017 | <i>A Randomized, Controlled, Phase III Clinical Trial to Evaluate the Efficacy and Tolerability of Risorine with Conventional Rifampicin in the Treatment of Newly Diagnosed Pulmonary Tuberculosis Patients</i> | Jammu, Bangalore, Ahmedabad   | Control arm of RCT                                                      | 117  |
| 128 | Saini       | 2016 | <i>A Retrospective Cohort Study of Treatment Outcome among HIV positive and HIV negative TB patients in Chandigarh, India</i>                                                                                    | Punjab                        | RNTCP treated adult drug sensitive patients                             | 3551 |
| 129 | Misra       | 2016 | <i>A study of hyponatremia in tuberculous meningitis</i>                                                                                                                                                         | Uttar Pradesh                 | TBM patients treated at government hospital                             | 76   |

|     |              |      |                                                                                                                                               |                |                                                                                                                                                         |     |
|-----|--------------|------|-----------------------------------------------------------------------------------------------------------------------------------------------|----------------|---------------------------------------------------------------------------------------------------------------------------------------------------------|-----|
| 130 | Marskole     | 2018 | <i>A Study of Impact of CD4 and BMI on Effectiveness of DOTS in HIV-TB Cases Registered in Hamidia Hospital Bhopal</i>                        | Madhya Pradesh | TB and TB HIV patients in hospital DOTS and ART center                                                                                                  | 248 |
| 131 | Das          | 2007 | <i>A study of pulmonary tuberculosis in the elderly</i>                                                                                       | West Bengal    | Pulmonary TB patients at hospital                                                                                                                       | 70  |
| 132 | Nagpal       | 2015 | <i>A Study of Sputum Conversion Rates Affecting the Treatment Outcome in Newly Diagnosed Smear Positive Cases under DOTS in Amritsar City</i> | Punjab         | NSP patients at TUs                                                                                                                                     | 250 |
| 133 | Nelliyanil   | 2012 | <i>A Study Of The Socio-Demographic Profile And Treatment Outcome Of Paediatric Tuberculosis Patients In Bangalore Mahanagar Palike Area</i>  | Karnataka      | TU pediatric TB cases                                                                                                                                   | 209 |
| 134 | Gharat       | 2017 | <i>A Study on Socio-demographic Profile and Outcome of Tuberculosis in HIV-TB Co-infected Cases in Surat City, Western India</i>              | Gujarat        | RNTCP HIV-TB patients                                                                                                                                   | 204 |
| 135 | Yerramilli   | 2017 | <i>A study on the clinical outcomes and management of meningitis at a tertiary care centre</i>                                                | Telangana      | Hospitalized TBM patients                                                                                                                               | 41  |
| 136 | Mukhopadhyay | 2014 | <i>Abdominal Tuberculosis with an Acute Abdomen: Our Clinical Experience</i>                                                                  | West Bengal    | Adult abdominal TB patients at government tertiary hospital between Jan 2009 and Dec 2011                                                               | 70  |
| 137 | Bunkar       | 2016 | <i>Add-on prednisolone in the management of cervical lymph node tuberculosis</i>                                                              | Rajasthan      | Cervical TB treated at hospital - DOTS only arm                                                                                                         | 60  |
| 138 | Alvarez-Uria | 2015 | <i>Adding Streptomycin to an Intensified Regimen for Tuberculous Meningitis Improves Survival in HIV-Infected Patients</i>                    | Andhra Pradesh | All HIV-infected patients diagnosed with tuberculous meningitis from 1 January 2011 to 1 October 2014 from the Vicente Ferrer HIV Cohort Study database | 79  |

|     |           |      |                                                                                                                                                                      |                |                                                                     |      |
|-----|-----------|------|----------------------------------------------------------------------------------------------------------------------------------------------------------------------|----------------|---------------------------------------------------------------------|------|
| 139 | Dela      | 2017 | <i>Adverse drug reactions and treatment outcome analysis of DOTS plus therapy of MDRTB patients at district tuberculosis centre: A four year retrospective study</i> | Gujarat        | MDR-TB patients treated by RNTCP, excluded natural causes of deaths | 125  |
| 140 | Kumar     | 2017 | <i>An Overview Of Anti-Tuberculosis Treatment (ATT) In CAT I Newly Diagnosed Cases Of Tuberculosis In RNTCP</i>                                                      | Madhya Pradesh | Hospital outpatients, new drug sensitive TB                         | 360  |
| 141 | Puri      | 2017 | <i>Antitubercular therapy induced liver function tests abnormalities in human immunodeficiency virus infected individuals</i>                                        | Maharashtra    | TB-HIV ATT-naive adult patients diagnosed with TB at ART centre     | 100  |
| 142 | Kondapaka | 2012 | <i>Are Tuberculosis Patients in a Tertiary Care Hospital in Hyderabad, India Being Managed According to National Guidelines?</i>                                     | Telangana      | TB inpatients                                                       | 1132 |
| 143 | Dhoble    | 2017 | <i>Assessment of the Socio-Demographic Profile and Treatment Outcome of Pediatric Tuberculosis Patients</i>                                                          | Maharashtra    | Pediatric patients from TU                                          | 69   |
| 144 | Jaison    | 2018 | <i>Assessment Of Treatment Outcome In Tuberculosis Patients Approaching A Tertiary Care Teaching Hospital</i>                                                        | Kerala         | TB patients treated at tertiary hospital                            | 101  |
| 145 | Datta     | 2015 | Can Vitamin D Supplementation Hasten Recovery Of Tuberculosis                                                                                                        | West Bengal    | PTB hospital patients                                               | 271  |
| 146 | Modi      | 2017 | <i>Clinical and radiological predictors of outcome in tubercular meningitis: A prospective study of 209 patients</i>                                                 | Punjab         | TBM patients at tertiary hospital                                   | 209  |
| 147 | Synmon    | 2017 | <i>Clinical and radiological spectrum of intracranial tuberculosis: A hospital based study in Northeast India</i>                                                    | Assam          | Intracranial TB patients                                            | 93   |

|     |           |      |                                                                                                                                                                                            |             |                                                                            |     |
|-----|-----------|------|--------------------------------------------------------------------------------------------------------------------------------------------------------------------------------------------|-------------|----------------------------------------------------------------------------|-----|
| 148 | Dole      | 2017 | <i>Clinical Profile and Treatment Outcome of Drug Resistant Tuberculosis Patients of Western Maharashtra, India</i>                                                                        | Maharashtra | DR TB patients treated at hospital                                         | 146 |
| 149 | Mukherjee | 2017 | <i>Clinical Profile of Tubercular Empyema with Special Reference to Diagnostic Role of Cartridge Based Nucleic Acid Amplification test (CBNAAT)</i>                                        | West Bengal | TB empyema patients at tertiary govt hospital                              | 40  |
| 150 | Mukherjee | 2014 | <i>Comparison between childhood and adult tuberculosis in a rural tuberculosis unit of West Bengal: A retrospective study</i>                                                              | West Bengal | Cases registered at TU between Jan 2008 and Dec 201, outcomes only for NSP | 741 |
| 151 | Parida    | 2014 | <i>Comparison of Directly Observed Treatment Short Course (DOTS) with Self-Administered Therapy in Pulmonary Tuberculosis in Udupi District of Southern India</i>                          | Karnataka   | Hospital DOTS records                                                      | 75  |
| 152 | Shukla    | 2016 | <i>Comparison of Outcome of Dots and Self Administered Therapy in Patients of Tuberculosis in Tertiary Care Hospital, Nainital</i>                                                         | Uttarakhand | Hospital TB patients - DOTS arm                                            | 60  |
| 153 | Gopalan   | 2018 | <i>Daily vs Intermittent Antituberculosis Therapy for Pulmonary Tuberculosis in Patients With HIV A Randomized Clinical Trial</i>                                                          | Tamil Nadu  | HIV-TB patients in RCT                                                     | 98  |
| 154 | Kant      | 2017 | <i>Delay in initiation of treatment after diagnosis of pulmonary tuberculosis in primary health care setting: eight year cohort analysis from district Faridabad, Haryana, North India</i> | Haryana     | Pulmoanry TB patients at PHCs                                              | 662 |
| 155 | Koul      | 2016 | <i>Demography and clinical outcome of pulmonary tuberculosis in Kashmir; 2 year prospective study</i>                                                                                      | Kashmir     | Adult pulmonary TB patients at public hospital                             | 72  |

|     |            |      |                                                                                                                                                     |                        |                                                                                 |     |
|-----|------------|------|-----------------------------------------------------------------------------------------------------------------------------------------------------|------------------------|---------------------------------------------------------------------------------|-----|
| 156 | Siddiqui   | 2017 | <i>Diabetes prevalence and its impact on health-related quality of life in tuberculosis patients</i>                                                | Delhi                  | DOTS centre TB patients                                                         | 316 |
| 157 | Das        | 2014 | <i>Directly-Observed and Self-Administered Tuberculosis Treatment in a Chronic, Low-Intensity Conflict Setting in India</i>                         | Andhra Pradesh, Odisha | DOT arm of MSF treated patients, community healthcare centre, initiated in 2012 | 55  |
| 158 | Arockiaraj | 2018 | <i>Drug resistant Skeletal Tuberculosis in a tertiary care centre in South India</i>                                                                | Tamil Nadu             | DR skeletal TB at tertiary centre                                               | 898 |
| 159 | Mittal     | 2011 | <i>Effect of Disease Related Variables on Treatment Outcome Under DOTS</i>                                                                          | Uttar Pradesh          | DOTS patients                                                                   | 900 |
| 160 | Kadam      | 2017 | Effectiveness Of DOTS Therapy Under Rntcp-Dots Strategy In Paediatric TB- Experience From Western India                                             | Maharashtra            | Pediatric patients at tertiary hospital                                         | 104 |
| 161 | Chopra     | 2017 | <i>Efficacy of alternate day Directly Observed Treatment Short-course (DOTS) in skeletal tuberculosis – A retrospective study</i>                   | Delhi                  | skeletal TB at RNTCP clinic                                                     | 218 |
| 162 | Lanjewar   | 2014 | <i>Evaluation of treatment outcome of tuberculosis patients in the urban field practice area of D. Y. Patil Medical College, Pimpri, Pune</i>       | Maharashtra            | Urban DOTS patients                                                             | 429 |
| 163 | Jain       | 2016 | <i>Evaluation study of treatment outcome in Tuberculosis patients receiving DOTS under RNTCP</i>                                                    | Madhya Pradesh         | RNTCP treated TB patients                                                       | 241 |
| 164 | Anandaraj  | 2017 | <i>Factors influencing delay in sputum smear conversion among new smear-positive pulmonary tuberculosis patients of Davangere tuberculosis unit</i> | Karnataka              | Adult pulmonary TB treated at DMC                                               | 233 |

|     |              |      |                                                                                                                                                             |               |                                                 |     |
|-----|--------------|------|-------------------------------------------------------------------------------------------------------------------------------------------------------------|---------------|-------------------------------------------------|-----|
| 165 | Bhattacharya | 2017 | <i>Follow up of Drug-Resistant Pulmonary Tuberculosis Patients in a DRTB Center in First Fifteen Months of Treatment</i>                                    | West Bengal   | DR pulmonary TB patients at government hospital | 142 |
| 166 | Prasad       | 2016 | <i>Frequency of adverse events observed with second-line drugs among patients treated for multidrug-resistant tuberculosis</i>                              | Uttar Pradesh | Pediatric TB cases                              | 98  |
| 167 | Taneja       | 2017 | <i>Home Based Care as an Approach to Improve the Efficiency of treatment for MDR Tuberculosis: A Quasi-Experimental Pilot Study</i>                         | Delhi         | Hospital chest clinic MDR patients              | 50  |
| 168 | Mohammed     | 2018 | <i>Hypothalamic and pituitary dysfunction is common in tubercular meningitis: A prospective study from a tertiary care center in Northern India</i>         | Punjab        | TBM patients at tertiary hospital               | 63  |
| 169 | Mahmood      | 2018 | <i>Impact Of Diabetes Mellitus On Treatment Outcome Of Multidrug Resistant Pulmonary Tuberculosis</i>                                                       | Uttar Pradesh | Hospital treated DOTS MDR patients              | 144 |
| 170 | Bhatt        | 2018 | <i>Impact of integrated psycho-socio-economic support on treatment outcome in drug resistant tuberculosis – A retrospective cohort study</i>                | Delhi         | Control arm in DOTS support trial at DTC        | 63  |
| 171 | Iype         | 2011 | <i>In-hospital mortality of intermittent vs daily antitubercular regimen in patients with meningeal tuberculosis—a retrospective study</i>                  | Kerala        | TBM at tertiary hospital                        | 55  |
| 172 | Tutu         | 2017 | <i>Incidence And Pattern Of Adverse Drug Reactions (ADRs) In Patients Treated For Tuberculosis Under DOTS At A Tertiary Care Hospital Of Northern India</i> | Uttar Pradesh | Hospital treated new TB DOTS patients           | 115 |



|     |           |      |                                                                                                                                                                                                                                       |                    |                                                                           |     |
|-----|-----------|------|---------------------------------------------------------------------------------------------------------------------------------------------------------------------------------------------------------------------------------------|--------------------|---------------------------------------------------------------------------|-----|
| 173 | Shah      | 2018 | <i>Increasing Prevalence of Pediatric Drug-resistant Tuberculosis in Mumbai, India, and Its Outcome</i>                                                                                                                               | Maharashtra        | Pediatric DR-TB                                                           | 110 |
| 174 | Ranjalkar | 2018 | <i>Isoniazid and rifampicin concentrations in children with tuberculosis with either a daily or intermittent regimen: implications for the revised RNTCP 2012 doses in India</i>                                                      | Tamil Nadu         | Pediatric TB patients treated at tertiary hospital, intermittent DOTS arm | 27  |
| 175 | Mundra    | 2017 | <i>Magnitude and determinants of adverse treatment outcomes among tuberculosis patients registered under Revised National Tuberculosis Control Program in a Tuberculosis Unit, Wardha, Central India: A record-based cohort study</i> | Maharashtra        | Patients registered at TU in 2014                                         | 510 |
| 176 | Jaryal    | 2011 | <i>Manifestations of tuberculosis in HIV/AIDS patients and its relationship with CD4 count</i>                                                                                                                                        | Himachal Pradesh   | HIV-TB patients                                                           | 87  |
| 177 | Augustine | 2015 | <i>Multidrug-resistant tuberculosis: Need for better diagnostic modalities and clinical end points – Five-year tertiary care hospital experience</i>                                                                                  | Dehli              | MDR culture confirmed patients at tertiary hospital                       | 40  |
| 178 | Sinha     | 2017 | <i>Nevirapine- versus Efavirenz-based antiretroviral therapy regimens in antiretroviral-naïve patients with HIV and Tuberculosis infections in India: a multi-centre study</i>                                                        | Delhi, Maharashtra | Efavirenz arm of HIV-TB RCT                                               | 140 |
| 179 | Latief    | 2016 | <i>Novel risk factors and early detection of anti tubercular treatment induced liver injury—Looking beyond American Thoracic Society Guidelines</i>                                                                                   | Jammu and Kashmir  | TB patients treated at tertiary hospital                                  | 200 |

|     |            |      |                                                                                                                                                                                                                                |                                                                   |                                                              |      |
|-----|------------|------|--------------------------------------------------------------------------------------------------------------------------------------------------------------------------------------------------------------------------------|-------------------------------------------------------------------|--------------------------------------------------------------|------|
| 180 | Sinha      | 2017 | <i>Once Daily Dose of Nevirapine (400 mg) Versus Twice-Daily Dose (200 mg) of Nevirapine-Based Highly Active Antiretroviral Therapy Regimens in Antiretroviral Naïve Patients with HIV and Tuberculosis Infection in India</i> | Delhi                                                             | Control arm of HAART trial in TB-HIV patients                | 31   |
| 181 | Kunoor     | 2017 | <i>Outcomes of patients treated with individualised anti-tuberculosis regimens in a tertiary care centre in India</i>                                                                                                          | Kerala                                                            | Patients treated at private tertiary hospital                | 54   |
| 182 | Gupta      | 2017 | <i>Predictors of adverse outcome in patients of tuberculous meningitis in a multi-centric study from India</i>                                                                                                                 | Delhi                                                             | TBM patients treated at hospital                             | 478  |
| 183 | Barman     | 2017 | Profile And Treatment Outcome Among Pulmonary Tuberculosis Patients Under DOTS Attending A Tertiary Care Centre In Dibrugarh District, Assam                                                                                   | Assam                                                             | PTB patients diagnosed with PTB treated at tertiary hospital | 661  |
| 184 | More       | 2017 | <i>Profile of drug-resistant tuberculosis in Western Maharashtra</i>                                                                                                                                                           | Maharashtra                                                       | Government treated DR TB patients                            | 96   |
| 185 | Shah       | 2017 | <i>Profile of Tuberculous Cervical Lymphadenopathy in Children</i>                                                                                                                                                             | Maharashtra                                                       | Pediatric cervical lymph TB                                  | 63   |
| 186 | Velayutham | 2018 | <i>Recurrence of tuberculosis among newly diagnosed sputum positive pulmonary tuberculosis patients treated under the Revised National Tuberculosis Control Programme, India: A multi-centric prospective study</i>            | Tamil Nadu, Karnataka, Delhi, Maharashtra, Madhya Pradesh, Kerala | RNTCP new SS+ adult pulmonary TB patients                    | 1565 |
| 187 | Anandaraj  | 2017 | Relationship Between Pre Treatment Bacillary Load And Smear Conversion And Treatment Outcome Of Pulmonary                                                                                                                      | Karnataka                                                         | Adult pulmonary TB patients treated at DMC                   | 313  |

|     |        |      |                                                                                                                                                                                 |                |                                    |      |
|-----|--------|------|---------------------------------------------------------------------------------------------------------------------------------------------------------------------------------|----------------|------------------------------------|------|
|     |        |      | Tuberculosis Patients In A TB Unit Of Karnataka                                                                                                                                 |                |                                    |      |
| 188 | Tiwari | 2012 | Relationship Between Sputum Smear Grading And Smear Conversion Rate And Treatment Outcome In The Patients Of Pulmonary Tuberculosis Undergoing DOTS- A Prospective Cohort Study | Delhi          | Chest clinic DOTS patients         | 338  |
| 189 | Kalita | 2016 | <i>Safety and efficacy of additional levofloxacin in tuberculous meningitis: A randomized controlled pilot study</i>                                                            | Uttar Pradesh  | Control arm of TBM RCT             | 28   |
| 190 | Sharma | 2016 | <i>Six months versus nine months anti-tuberculous therapy for female genital tuberculosis: a randomized controlled trial</i>                                                    | Delhi          | Female genital TB with infertility | 89   |
| 191 | Rohit  | 2018 | <i>Socio-demographic profile and outcome of TB patients registered at DTC Rewa of Central India</i>                                                                             | Madhya Pradesh | DTC TB patients                    | 133  |
| 192 | Dhaked | 2018 | <i>Socio-demographic profile and treatment outcomes in pediatric TB patients attending DOTS centers in urban areas of Delhi</i>                                                 | Delhi          | Pediatric TU patients in Delhi     | 140  |
| 193 | Bagga  | 2017 | Socio-Epidemiological Characteristics And Treatment Outcome Of Adult Tuberculosis Patients Under Directly Observed Treatment Short Course In Ludhiana City                      | Punjab         | Adult TU patients                  | 221  |
| 194 | Lepcha | 2017 | <i>Sociodemographic profile and treatment outcome of tuberculosis patients registered under Directly Observed Treatment Short course in</i>                                     | Sikkim         | TU patients                        | 2638 |

|     |              |      |                                                                                                                                                                                 |                |                                             |     |
|-----|--------------|------|---------------------------------------------------------------------------------------------------------------------------------------------------------------------------------|----------------|---------------------------------------------|-----|
|     |              |      | <i>East Sikkim with reference to defaulters</i>                                                                                                                                 |                |                                             |     |
| 195 | Banga        | 2018 | <i>Spinal Tuberculosis – Directly Observed Treatment and Short Course or Daily Anti Tubercular Therapy -Are We Over Treating?</i>                                               | Punjab         | Spinal TB treated at hospital - DOTS arm    | 30  |
| 196 | Patel        | 2018 | <i>Sputum Smear and Culture Conversion in Multidrug Resistance Tuberculosis Patients in Seven Districts of Central Gujarat, India: A Longitudinal Study</i>                     | Gujarat        | DOTS Plus DR patients                       | 142 |
| 197 | Brahmapurkar | 2017 | <i>Sputum smear grading and treatment outcome among directly observed treatment short course patients of tuberculosis unit, Jagdalpur, Bastar</i>                               | Chhattisgarh   | TU patients, 2014                           | 496 |
| 198 | Yadav        | 2016 | <i>Study of factors influencing response and outcome of Cat-IV regimen in MDRTB patients</i>                                                                                    | Rajasthan      | MDR patients, hospital DOTS+ centre         | 115 |
| 199 | Patil        | 2017 | Study Of Treatment Outcome Of Tuberculosis Patients Placed For Treatment Under Directly Observed Therapy Short Course (DOTS) At A Tuberculosis Unit, Karad, Western Maharashtra | Maharashtra    | TU patients                                 | 319 |
| 200 | Kumar        | 2017 | Study Of Weight Variation During Anti-Tuberculosis Treatment In Tuberculosis Patients Put On DOTS In RNTCP In Central India                                                     | Madhya Pradesh | RNTCP treated patients at tertiary hospital | 453 |
| 201 | Singh        | 2018 | <i>Surgery for Abdominal Tuberculosis in the Present Era: Experience from a Tertiary-Care Center</i>                                                                            | Punjab         | Abdominal TB at tertiary hospital           | 35  |

|     |           |      |                                                                                                                                                            |                |                                         |      |
|-----|-----------|------|------------------------------------------------------------------------------------------------------------------------------------------------------------|----------------|-----------------------------------------|------|
| 202 | Kumar     | 2017 | <i>Thoracoscopic Decortication of Stage III Tuberculous Empyema Is Effective and Safe in Selected Cases</i>                                                | Delhi          | TB empyema patients receiving surgery   | 135  |
| 203 | Saharia   | 2015 | <i>Thyroid profile status of patients treated for multidrug-resistant tuberculosis in state of Meghalaya, India</i>                                        | Meghalaya      | DTC MDR patients                        | 114  |
| 204 | Sarpal    | 2014 | <i>Treatment Outcome Among the Retreatment Tuberculosis (TB) Patients under RNTCP in Chandigarh, India</i>                                                 | Punjab         | RNTCP retreatment patients              | 545  |
| 205 | Kumar     | 2018 | Treatment Outcome And Efficacy Of Anti-Tuberculosis Treatment In Tuberculosis Patients Put On DOTS In RNTCP In Central India                               | Madhya Pradesh | Hospital outpatients starting DOTS      | 454  |
| 206 | Cherian   | 2016 | <i>Treatment outcome of extrapulmonary tuberculosis under Revised National Tuberculosis Control Programme</i>                                              | NA             | RNTCP EPTB patients in 3 districts      | 2046 |
| 207 | Prajapati | 2017 | <i>Treatment Outcome of Patients Having Extensively Drug-resistant Tuberculosis in Gujarat, India</i>                                                      | Gujarat        | XDR TB patients                         | 112  |
| 208 | Gupta     | 2018 | <i>Treatment Outcomes Associated with Multidrugresistant Tuberculosis</i>                                                                                  | Delhi          | MDR TB patients at tertiary DOTS center | 819  |
| 209 | Ramesh    | 2012 | <i>Treatment outcomes of childhood tuberculosis with DOTS strategy in Kottayam, Kerala</i>                                                                 | Kerala         | pediatric TU patients                   | 155  |
| 210 | Prakash   | 2017 | <i>Tuberculosis and human immunodeficiency virus co-infection: clinico-demographic determinants at an anti-retroviral therapy center in Northern India</i> | Bihar          | HIV-TB patients at ART center           | 508  |

|     |             |      |                                                                                                                                                                                                                                                       |                                                                                |                                                  |      |
|-----|-------------|------|-------------------------------------------------------------------------------------------------------------------------------------------------------------------------------------------------------------------------------------------------------|--------------------------------------------------------------------------------|--------------------------------------------------|------|
| 211 | Chadha      | 2018 | <i>Tuberculosis diagnostic and treatment practices in private sector: Implementation study in an Indian city</i>                                                                                                                                      | Karnataka                                                                      | Privately treated TB patients                    | 101  |
| 212 | Puri        | 2013 | <i>Tuberculosis of the duodenum: clinical presentation, diagnosis and outcome</i>                                                                                                                                                                     | Delhi                                                                          | TB of the duodenum patients at tertiary hospital | 10   |
| 213 | Jackson     | 2017 | <i>Tuberculosis treatment outcomes among disadvantaged patients in India</i>                                                                                                                                                                          | Jarkkhand, Odisha, Chhattisgarh, Rajasthan, Maharashtra, Madhya Pradesh, Delhi | OpASHA treated patients                          | 8415 |
| 214 | Parmar      | 2018 | <i>Unacceptable treatment outcomes and associated factors among India's initial cohorts of multidrug-resistant tuberculosis (MDR-TB) patients under the revised national TB control programme (2007–2011): Evidence leading to policy enhancement</i> | NA                                                                             | all MDR patients registered with RNTCP 2007-2011 | 3712 |
| 215 | Suryawanshi | 2017 | <i>Unfavourable outcomes among patients with MDR-TB on the standard 24-month regimen in Maharashtra, India</i>                                                                                                                                        | Maharashtra                                                                    | RNTCP MDR TB patients                            | 4024 |
| 216 | Dhuria      | 2016 | <i>Universal access to DOTS in Delhi prisons: Where do we stand?</i>                                                                                                                                                                                  | Delhi                                                                          | TB patients treated by RNCTP in Delhi prison     | 603  |
| 217 | Dangeti     | 2018 | <i>Vitamin D deficiency in patients with tuberculous meningitis and its relationship with treatment outcome</i>                                                                                                                                       | Puducherry                                                                     | TBM patients at tertiary hospital                | 39   |
| 218 | Karthika    | 2018 | <i>Why are people dying due to tuberculosis? A study from Alappuzha District, Kerala</i>                                                                                                                                                              | Kerala                                                                         | RNTCP treated patients                           | 1618 |
